# Supplementary material for: One-pot synthesis of graphene/zinc oxide by microwave irradiation with enhanced supercapacitor performance
Source: Royal Society of Chemistry journal article supplement (doi:10.1039/c5ra24212f), 2016-01-01
Supplement: c5ra24212f1.pdf [file c5ra24212f1.pdf]

## Supplementary Information for

### One-pot synthesis of graphene/zinc oxide by microwave irradiation with enhanced supercapacitor performance

Yanzhen Guo, Binbin Chang, Ting Wen, Chunmei Zhao, Hang Yin, Yannan Zhou,

Yonggang Wang, Baocheng Yang\*, Shouren Zhang\*

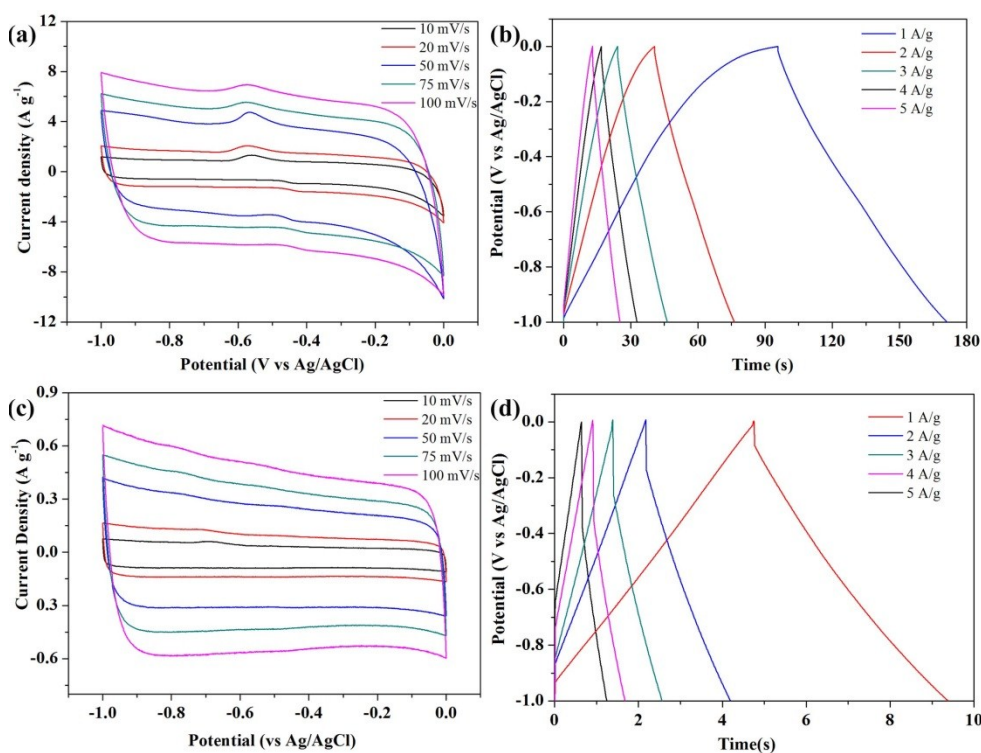

**Fig. S1** (a, c) CV curves of MRGO and ZnO at different scan rates measured in a three-electrode system; (b, d) Galvanostatic charge–discharge curves of MRGO and ZnO electrode with different current densities.

---

\* Institute of Nanostructured Functional Materials, Huanghe Science and Technology College, Zhengzhou, Henan 450006, China. E-mail: [ybc@hhstu.edu.cn](mailto:ybc@hhstu.edu.cn), [zhangshouren1984@126.com](mailto:zhangshouren1984@126.com)

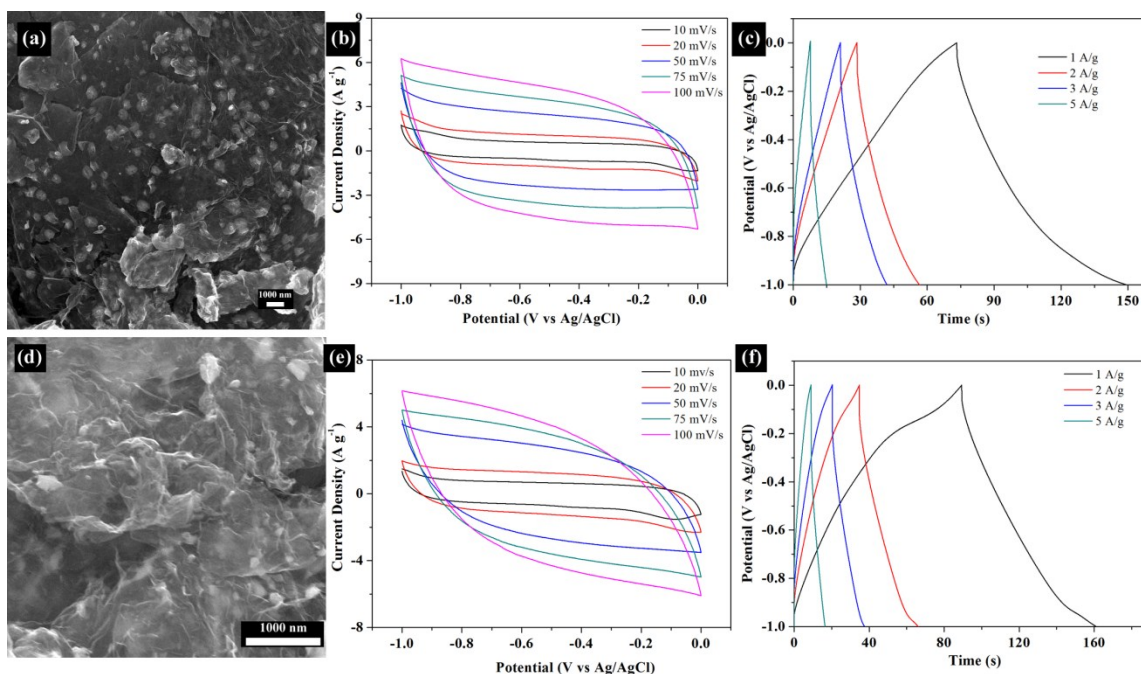

**Fig. S2** SEM image, CV curves with different scan rates and galvanostatic charge-discharge curves with different densities of MRGO/ZnO with the weight ratio of graphene oxide and  $\text{Zn}(\text{CH}_3\text{COO})_2 \cdot 2\text{H}_2\text{O}$  of 1:1 (a, b, c) and 4:1 (d, e, f), respectively.

Table S1 Electrochemical performance of the samples with different weight ratio of graphene oxide and  $\text{Zn}(\text{CH}_3\text{COO})_2 \cdot 2\text{H}_2\text{O}$  after microwave irradiation

| Weight ratio of graphene oxide and $\text{Zn}(\text{CH}_3\text{COO})_2 \cdot 2\text{H}_2\text{O}$ | 4:1                   | 2:1                    | 1:1                   |
|---------------------------------------------------------------------------------------------------|-----------------------|------------------------|-----------------------|
| Specific capacitance at a current density of $1 \text{ A g}^{-1}$                                 | $75 \text{ F g}^{-1}$ | $201 \text{ F g}^{-1}$ | $79 \text{ F g}^{-1}$ |

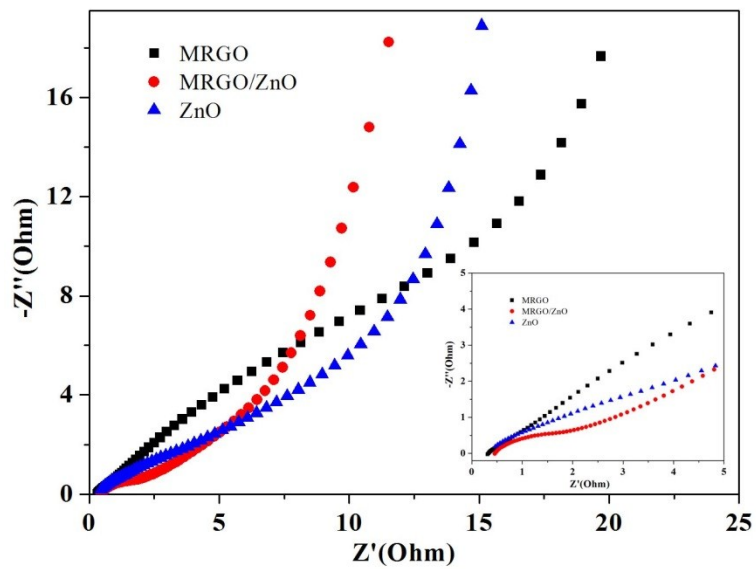

**Fig. S3** Nyquist plots of MRGO, ZnO and MRGO/ZnO in a two-electrode system, inset is the expanded high-frequency region of the plots.
